# Supplementary material for: GPR40 partial agonist MK-2305 lower fasting glucose in the Goto Kakizaki rat via suppression of endogenous glucose production
Source: PLoS One. 2017 May 23;12(5):e0176182. doi: 10.1371/journal.pone.0176182 (PMC5441580; doi:10.1371/journal.pone.0176182)
Supplement: S2 File — (XLSX) [file pone.0176182.s002.xlsx]

## Sheet: Sheet1
Figure 1b: In vitro pharmacology of MK-2305.
	Receptor Activation (%)
Concentration (M)	MK-2305	AMG837	AMG1638
6e-11	-5.868	-13.9
2e-10	5.687	16.08
6e-10	15.977	60.67
2e-09	34.8	130.13
6e-09	73.738	172.99
2e-08	136.125	227.08
6e-08	132.719	200.28
2e-07	169.192	196.43
6e-07	163.035	181.19
2e-06	154.32	187.97
4e-12			-6.21
1.5e-11			-17.89
6.1e-11			2.04
2.44e-10			11.01
9.77e-10			17.96
3.91e-09			22.94
1.56e-08			131.92
6.25e-08			274.86
2.5e-07			361.39
1e-06			370.16
